# Supplementary material
Source: PubMed Central journal article supplement (PMC6173134)
Supplement: jps-43-3-D18-036_s001.pdf [file jps-43-3-D18-036_s001.pdf]

# Journal of Pesticide Science

supplementary materials

DOI:10.1584/jpestics.D18-036

## **Biosynthesis and accumulation of GABA in rice plants treated with acetic acid.**

Shunsaku ISAJI, Naoko YOSHINAGA, Masayoshi TERAISHI, Daisuke OGAWA, Etsuko  
KATO, Yutaka OKUMOTO, Yoshiki HABU and Naoki MORI\*

Pesticide Science Society of Japan

*<http://pssj2.jp/eng/>*

## Supplemental Information 1

- (A) Probe voltage of 4.50 kV, detector voltage of 1.30 kV, heat block temperature of 200°C, DL temperature of 250°C, nebulizer gas flow of 1.5 L/min and the analytical mode utilized ESI positive scans; mass range of  $m/z$  150-500.
- (B) Probe voltage of 4.50 kV, detector voltage of -1.30 kV, heat block temperature of 200°C, DL temperature of 250°C, nebulizer gas flow of 1.5 L/min and the analytical mode utilized ESI negative scans; mass range of  $m/z$  100-1000.

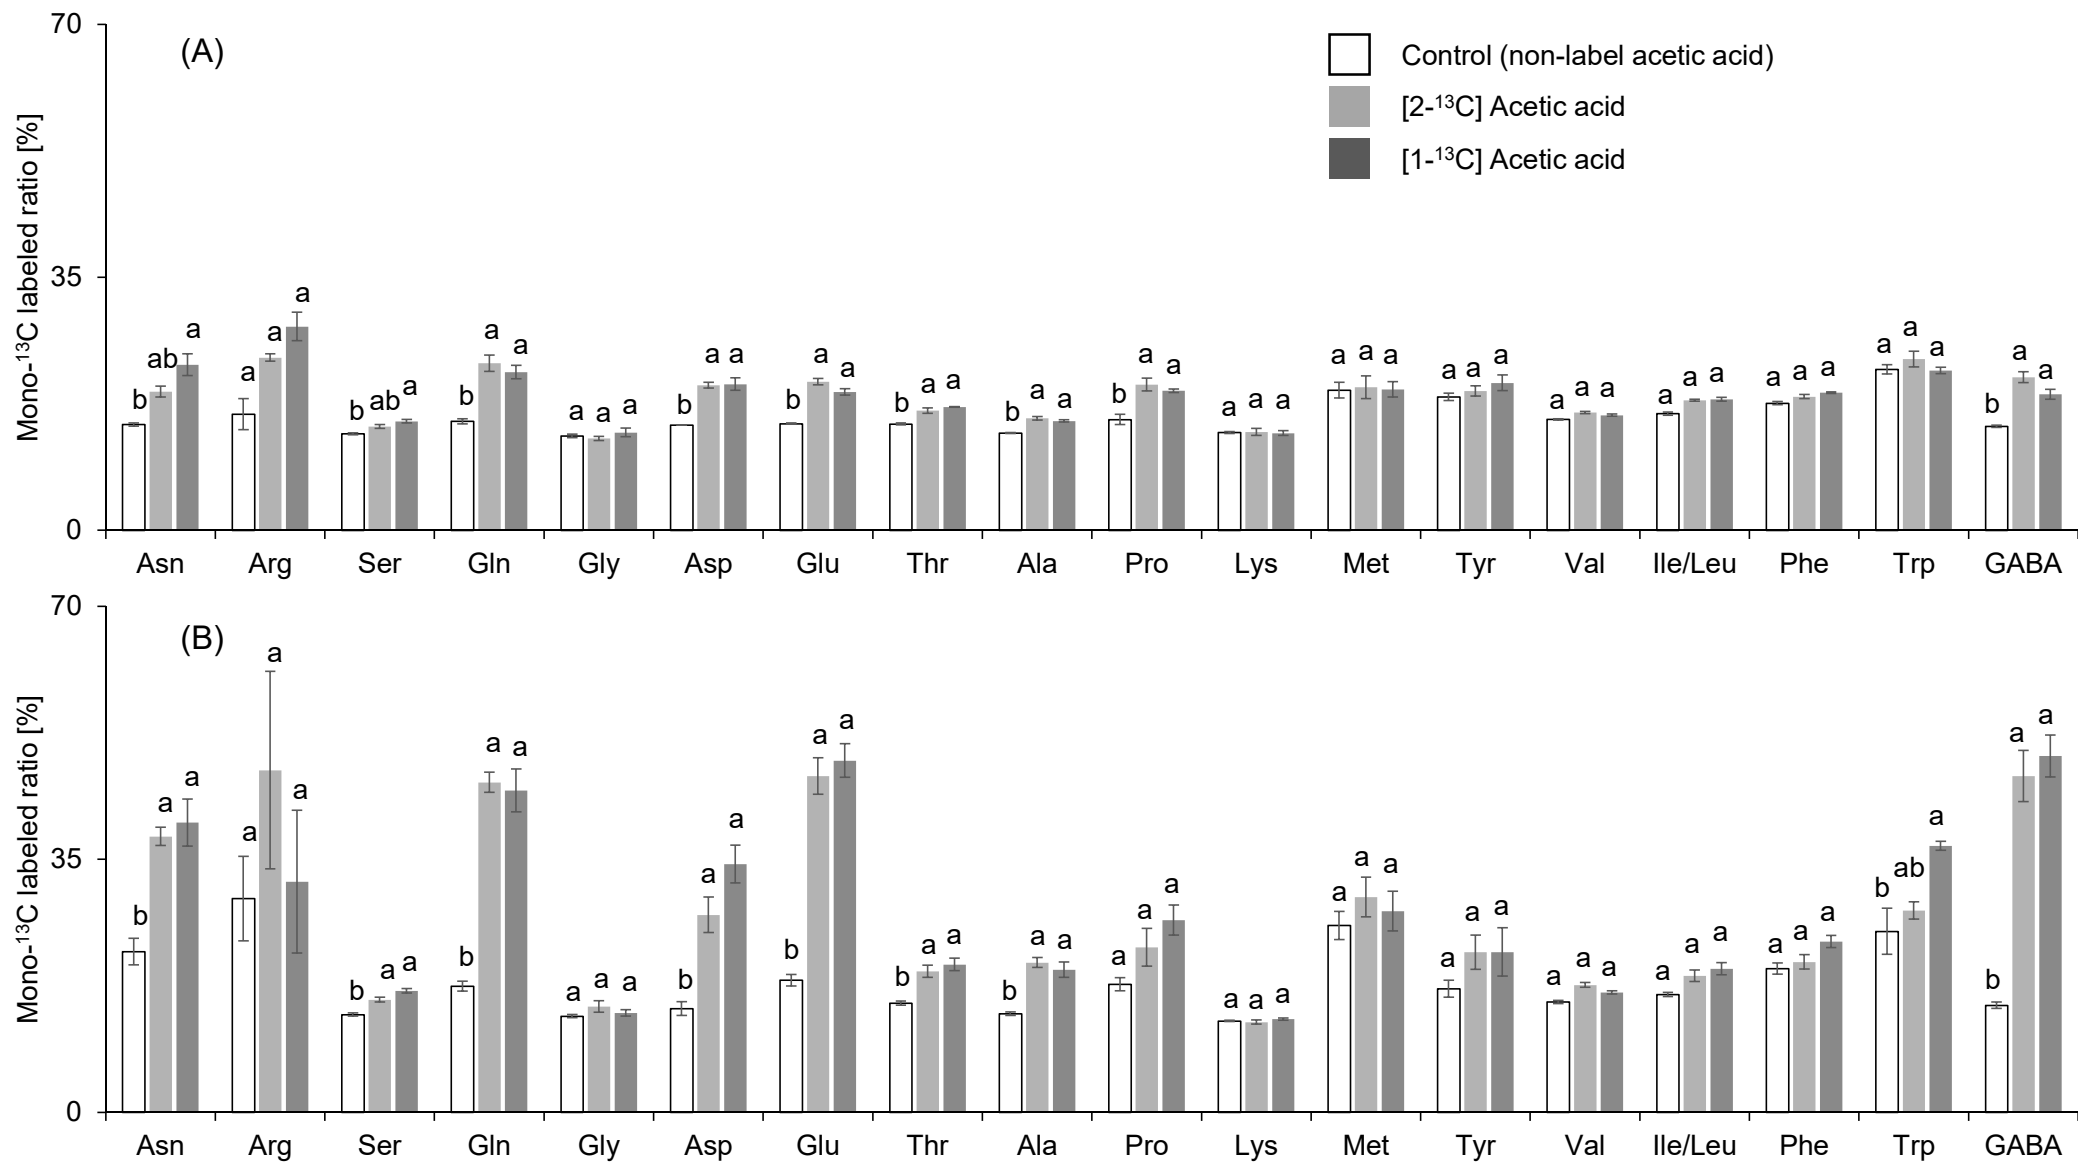

**Supplemental Fig. S1** <sup>13</sup>C-labeled rates of amino acids (A) in shoots and (B) in roots. (Different characters indicate significant differences,  $p < 0.05$  using Tukey–Kramer’s multiple test,  $n=4$ )

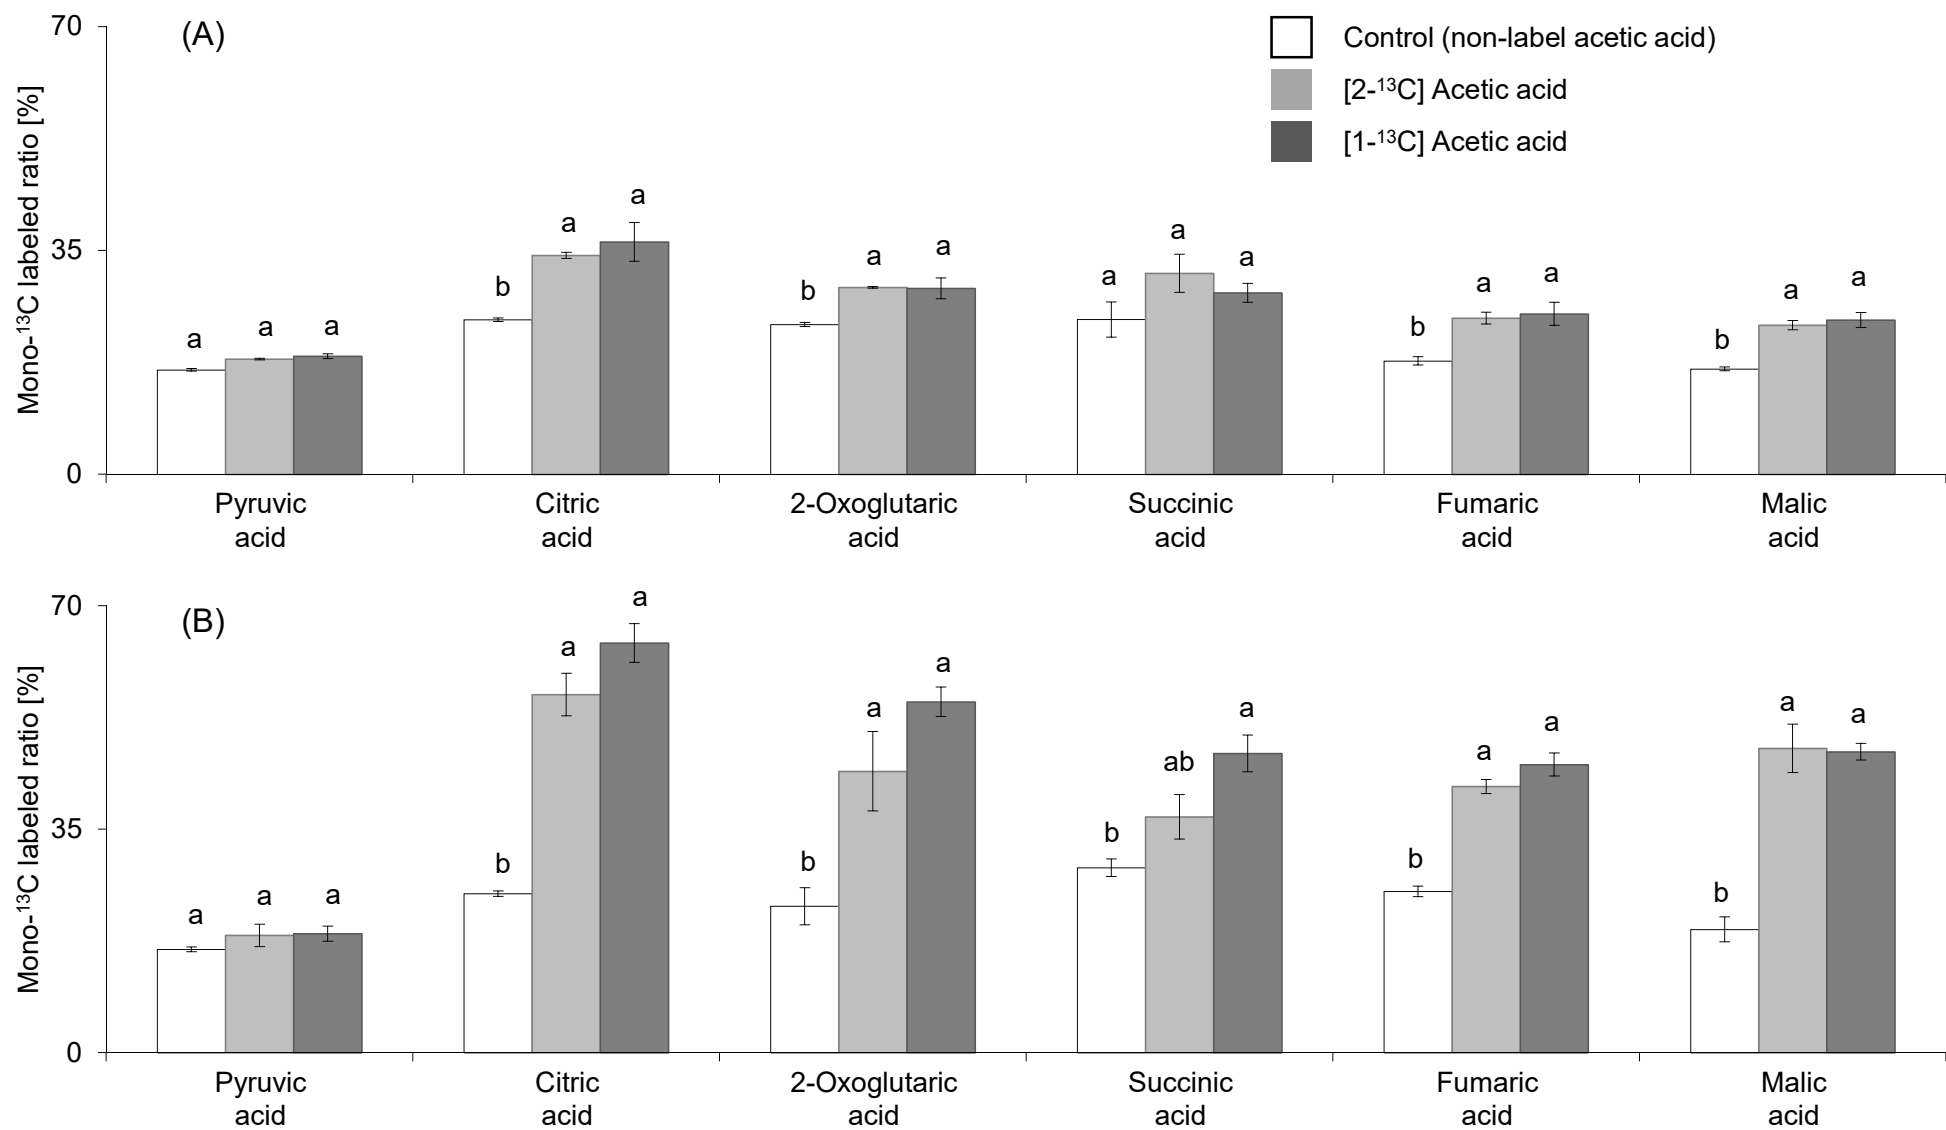

**Supplemental Fig. S2** <sup>13</sup>C-labeled rates of organic acids (A) in shoots and (B) in roots. (Different characters indicate significant differences,  $p < 0.05$  using Tukey–Kramer’s multiple test,  $n=4$ )

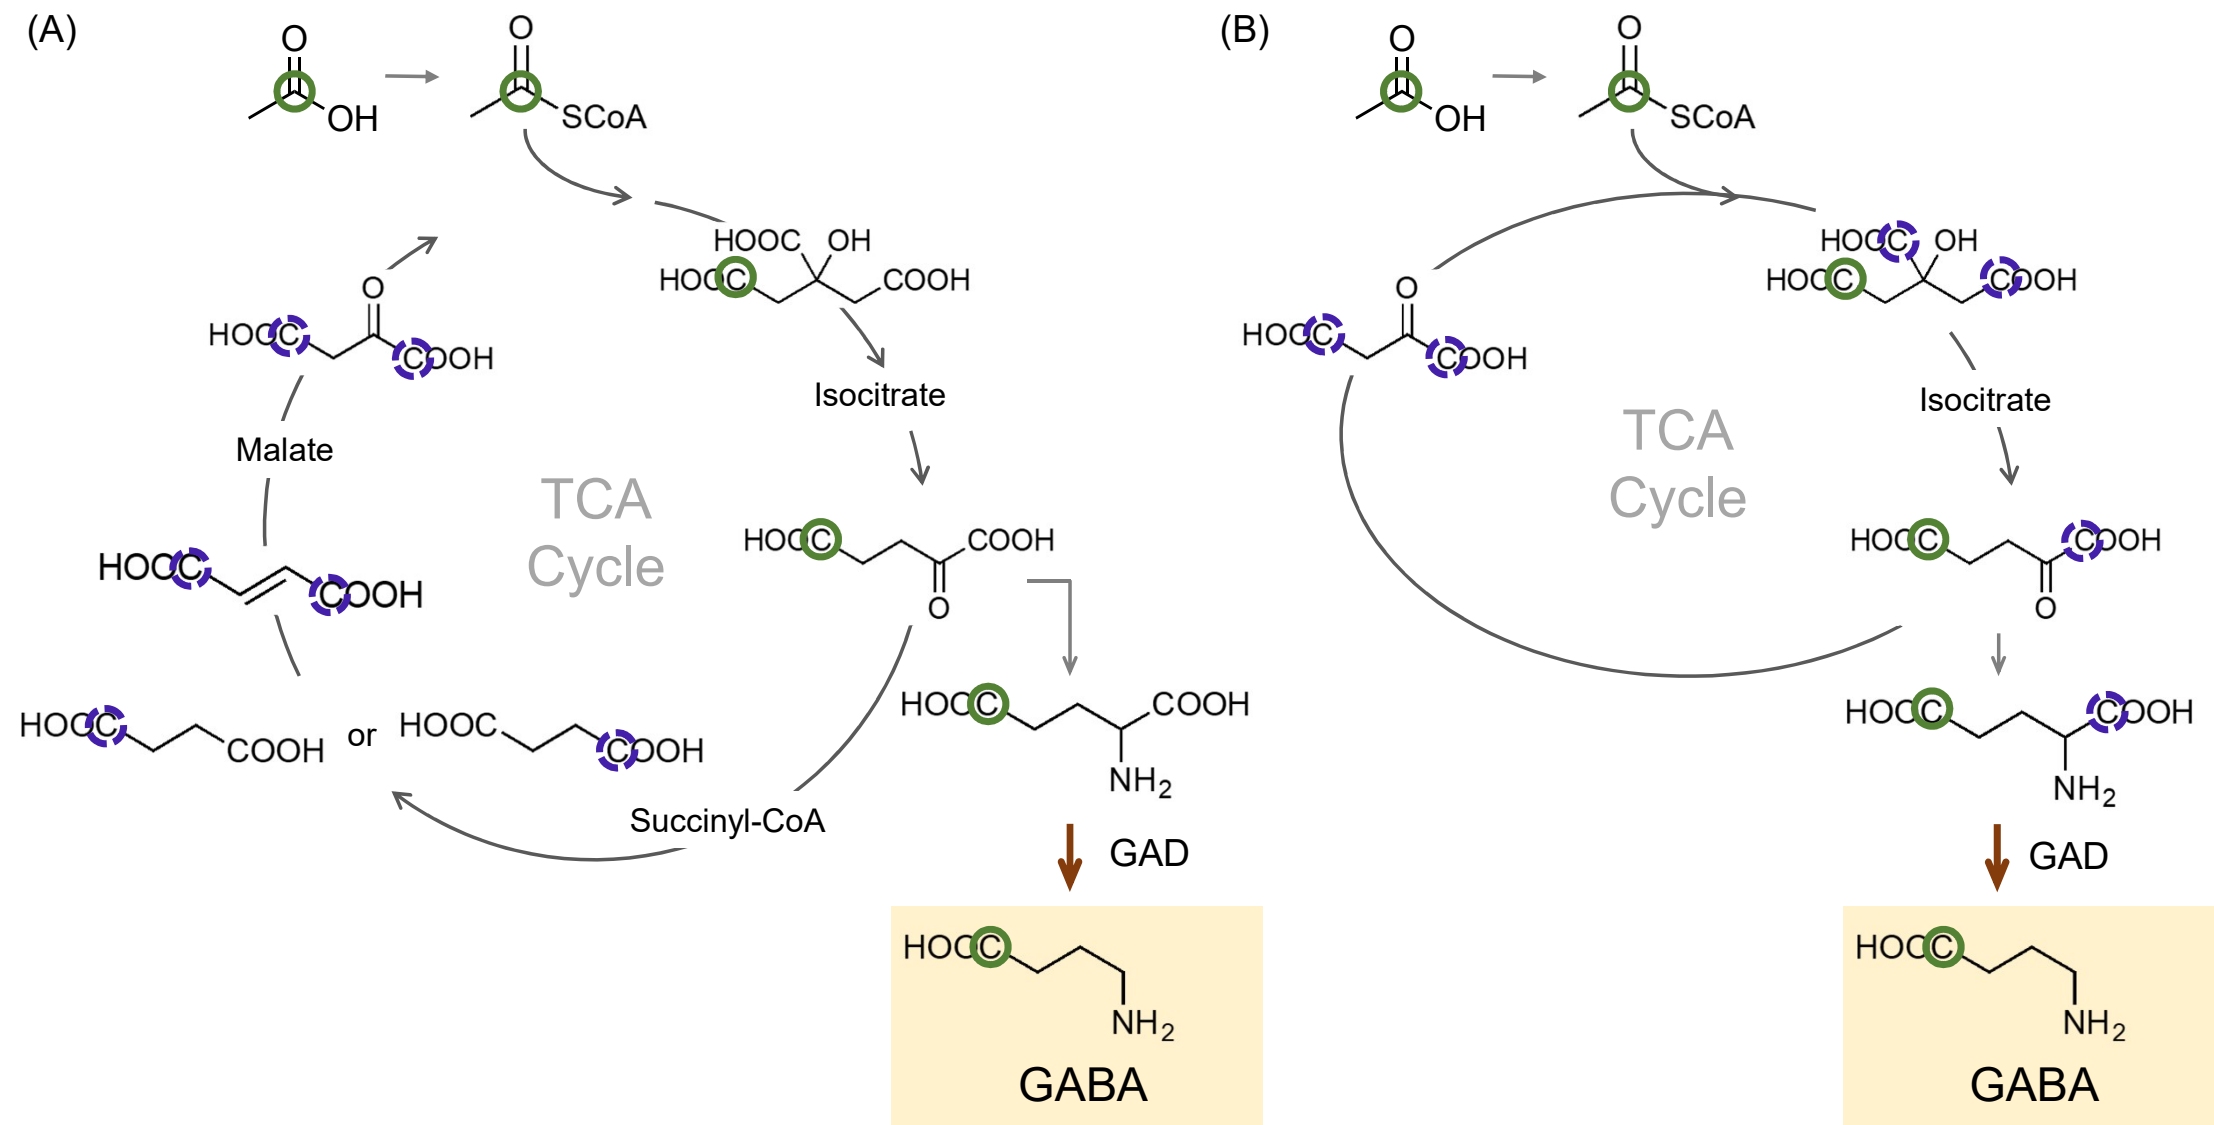

**Supplemental Fig. S3** The expected  $^{13}\text{C}$ -labeled position of metabolites under treatment with  $[1-^{13}\text{C}]$  acetic acid (A) in the first round and (B) in the second and later rounds.
